# Supplementary material for: Dominating Role of Ionic Strength in the Sedimentation of Nano‐TiO2 in Aquatic Environments
Source: Hindawi journal article supplement (doi:10.1155/2015/851928), 2015-01-01
Supplement: f1 [file 851928.f1.pdf]

1  
2  
3  
4  
5  
6  
7  
8  
9  
10  
11  
12  
13  
14  
15  
16  
17  
18  
19

# Supplementary materials

For Journal of Nanomaterials

## Dominating Role of Ionic Strength in the Sedimentation of Nano-TiO<sub>2</sub> in Aquatic Environments

Guang'an He<sup>1</sup>, Rui Chen<sup>1</sup>, Shushen Lu<sup>1</sup>, Chengchun Jiang<sup>3</sup>, Hong Liu<sup>1,2\*</sup>, and Chuan Wang<sup>2</sup>

<sup>1</sup> School of Chemistry and Chemical Engineering, Sun Yat-sen University, Guangzhou 510275, China

<sup>2</sup> Chongqing Institute of Green and Intelligent Technology, Chinese Academy of Sciences, Chongqing 400714, China

<sup>3</sup> School of Civil and Environmental Engineering, Shenzhen Polytechnic, Shenzhen 518055, China

The supplementary materials consist of 9 pages, 9 tables and 6 figures.

---

\* Corresponding author: Hong Liu  
E-mail address: liuhong@cigit.ac.cn  
Phone: +86-23-65935801  
Fax: +86-23-65935803

20 The characterization of nano-titanium dioxide (n-TiO<sub>2</sub>)

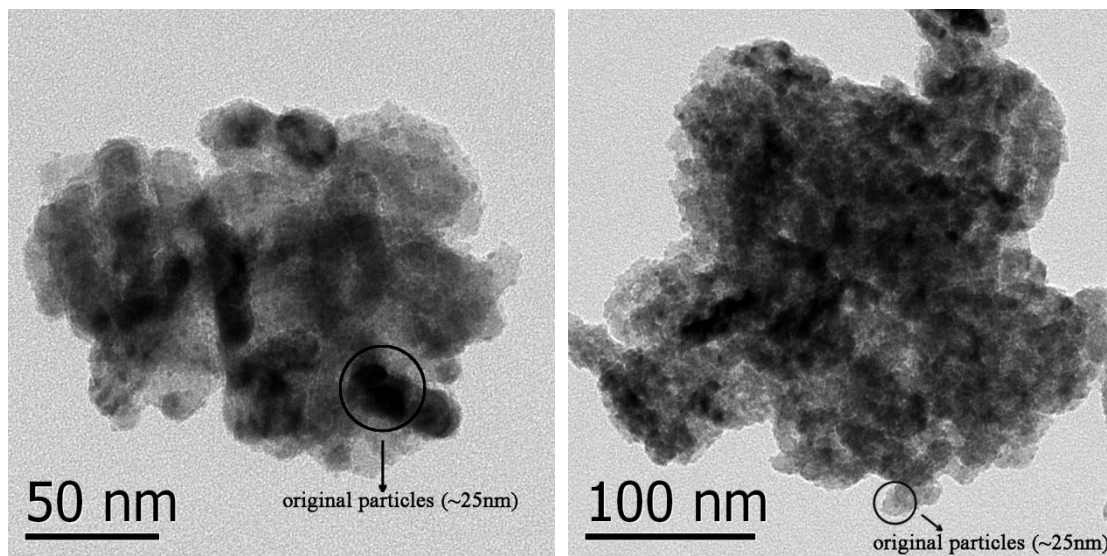

21

22

FIGURE S1: The transmission electron microscope images of n-TiO<sub>2</sub>.

23

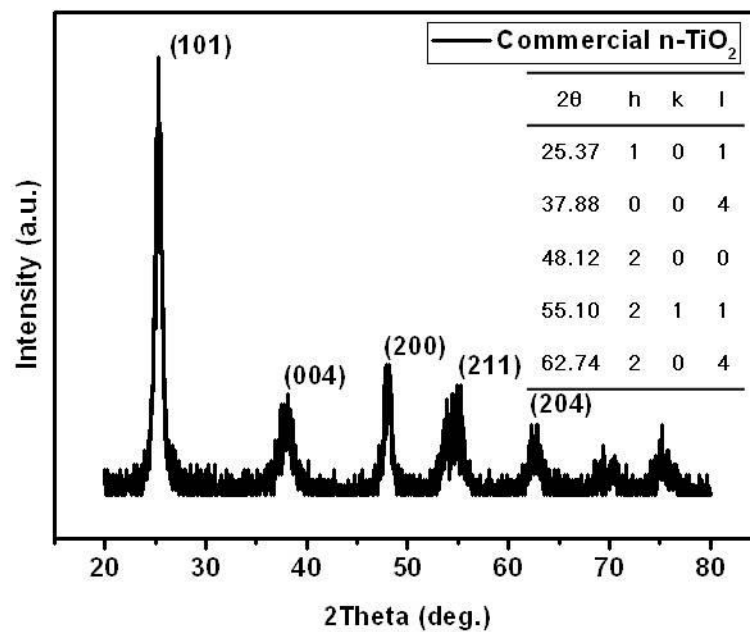

24

25

FIGURE S2: The X-ray diffractometer patterns of n-TiO<sub>2</sub>.

26

27

28 **The standard curve of n-TiO<sub>2</sub> concentration**

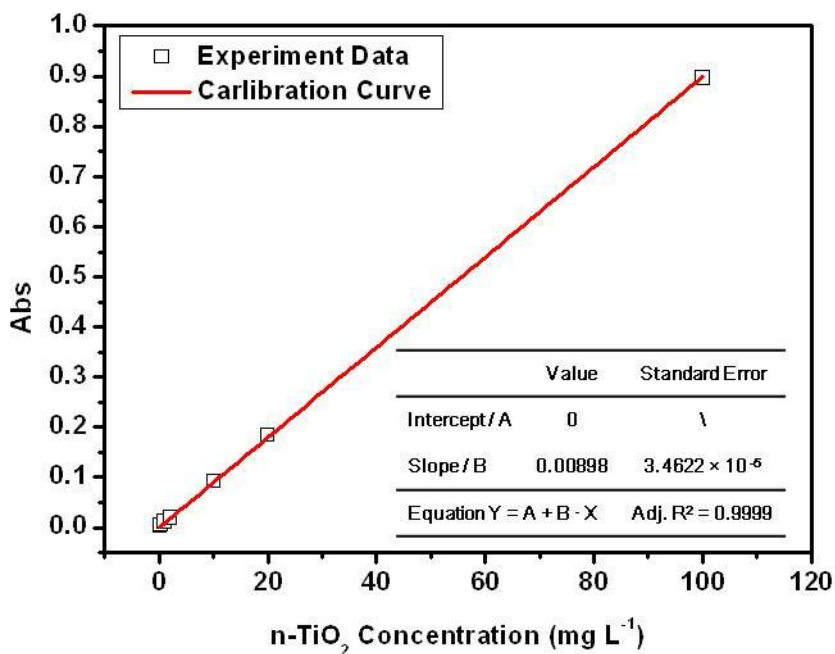

29

30

FIGURE S3: The standard curve of n-TiO<sub>2</sub>.

31

32 **The analysis of natural organic matter (NOM)**

33

TABLE S1: The C, N, H and S relative concentration of NOM.

| NOM | C (%) | H (%) | N (%) | S (%) | C/N     | C/H     |
|-----|-------|-------|-------|-------|---------|---------|
|     |       |       |       |       | Ratio   | Ratio   |
| FA  | 41.28 | 4.092 | 0.85  | 0.479 | 48.5943 | 10.0884 |
| HA  | 61.19 | 3.532 | 1.43  | 0.797 | 42.6427 | 17.3229 |

34

35

36

37 TABLE S2: The total carbon (TC), total organic carbon (TOC) and inorganic carbon (IC) concentration  
 38 of NOM.

| NOM | TC (mg L <sup>-1</sup> ) | TOC (mg L <sup>-1</sup> ) | IC (mg L <sup>-1</sup> ) |
|-----|--------------------------|---------------------------|--------------------------|
| FA  | 6.97                     | 6.39                      | 0.579                    |
| HA  | 6.45                     | 5.98                      | 0.473                    |

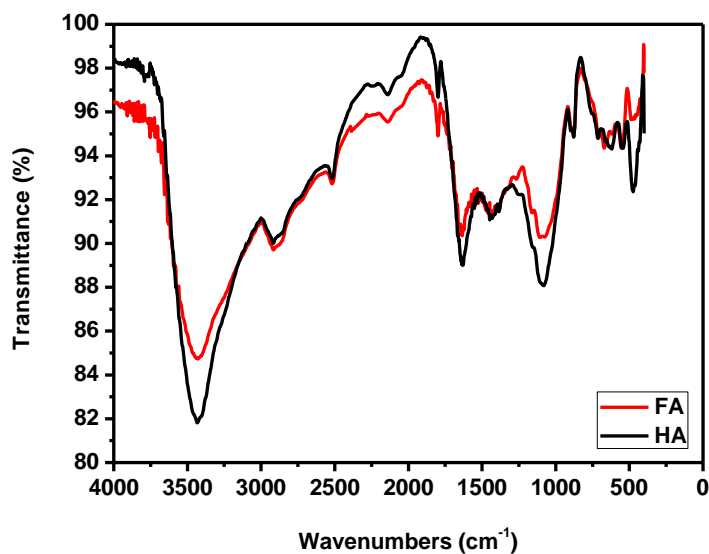

39

40

FIGURE S4: The infrared radiation spectrum of NOM.

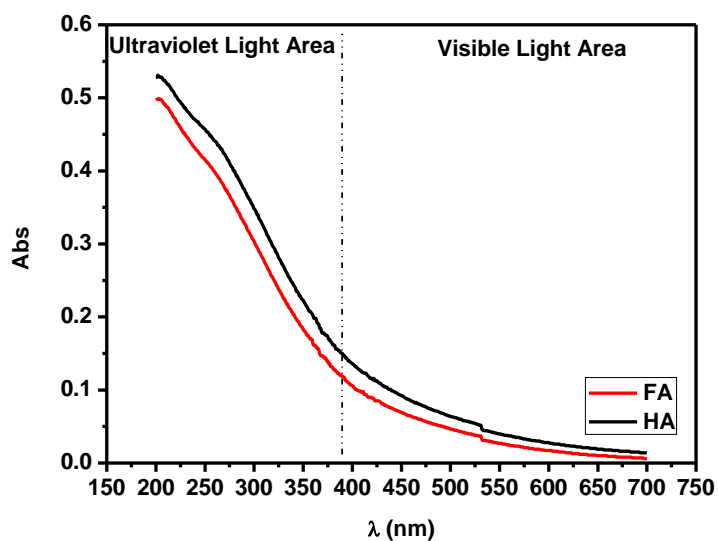

41

42

FIGURE S5: The ultraviolet-visible spectrum of NOM.

43 **The analysis of the environmental water samples**

44 TABLE S3: Common ion analysis of the environmental water samples.

| NO.                | Na <sup>+</sup><br>(mM) | K <sup>+</sup><br>(mM) | Mg <sup>2+</sup><br>(mM) | Ca <sup>2+</sup><br>(mM) | Cl <sup>-</sup><br>(mM) | NO <sub>3</sub> <sup>-</sup><br>(mM) | SO <sub>4</sub> <sup>2-</sup><br>(mM) |
|--------------------|-------------------------|------------------------|--------------------------|--------------------------|-------------------------|--------------------------------------|---------------------------------------|
| 1 <sup>#</sup>     | 0.31                    | 0.06                   | 0.14                     | 0.81                     | 0.28                    | 0.14                                 | 0.22                                  |
| 2 <sup>#</sup>     | 1.48                    | 0.17                   | 0.24                     | 1.06                     | 1.13                    | 0.20                                 | 0.84                                  |
| 3 <sup>#</sup>     | 0.81                    | 0.17                   | 0.14                     | 0.80                     | 0.61                    | 0.10                                 | 0.44                                  |
| 10%-4 <sup>#</sup> | 40.6                    | 0.92                   | 4.63                     | 0.84                     | 44.9                    | < 0.003                              | 2.57                                  |
| 5 <sup>#</sup>     | 16.6                    | 0.51                   | 1.97                     | 0.87                     | 19.5                    | 0.14                                 | 1.25                                  |
| 6 <sup>#</sup>     | 0.25                    | 0.04                   | 0.02                     | 0.04                     | 0.05                    | < 0.008                              | 0.04                                  |
| 7 <sup>#</sup>     | 8.07                    | 0.03                   | 0.36                     | 0.95                     | 5.90                    | 0.48                                 | 2.89                                  |

45 **\*4<sup>#</sup> phreatic water sample was diluted because of its high salinity.**

46

47 TABLE S4: pH of the environmental water samples.

| NO. | 1 <sup>#</sup> | 2 <sup>#</sup> | 3 <sup>#</sup> | 10%-4 <sup>#</sup> | 5 <sup>#</sup> | 6 <sup>#</sup> | 7 <sup>#</sup> |
|-----|----------------|----------------|----------------|--------------------|----------------|----------------|----------------|
| pH  | 7.4            | 7.9            | 7.1            | 7.5                | 8.0            | 6.8            | 6.6            |

48 **\*4<sup>#</sup> phreatic water sample was diluted because of its high salinity.**

49

50

51

52

53

54

TABLE S5: Conductivity of the environmental water samples.

| NO.                      | 1 <sup>#</sup> | 2 <sup>#</sup> | 3 <sup>#</sup> | 10%-4 <sup>#</sup> | 5 <sup>#</sup> | 6 <sup>#</sup> | 7 <sup>#</sup> |
|--------------------------|----------------|----------------|----------------|--------------------|----------------|----------------|----------------|
| K (mS cm <sup>-1</sup> ) | 0.247          | 0.512          | 0.311          | 5.65               | 2.56           | 0.053          | 1.39           |

55

\*4<sup>#</sup> phreatic water sample was diluted because of its high salinity.

56

57

TABLE S6: Carbon analysis of the environmental water samples.

| NO.                | TOC (mg L <sup>-1</sup> ) | TC (mg L <sup>-1</sup> ) | IC (mg L <sup>-1</sup> ) |
|--------------------|---------------------------|--------------------------|--------------------------|
| 1 <sup>#</sup>     | 2.132                     | 19.23                    | 17.10                    |
| 2 <sup>#</sup>     | 1.556                     | 23.73                    | 22.18                    |
| 3 <sup>#</sup>     | 1.623                     | 14.82                    | 13.20                    |
| 10%-4 <sup>#</sup> | 0.196                     | 2.847                    | 2.650                    |
| 5 <sup>#</sup>     | 1.706                     | 16.35                    | 14.65                    |
| 6 <sup>#</sup>     | 3.432                     | 6.668                    | 3.236                    |
| 7 <sup>#</sup>     | 5.696                     | 18.22                    | 12.52                    |

58

\*4<sup>#</sup> phreatic water sample was diluted because of its high salinity.

59

60

61

62

63

64

65

66 The isoelectric point of n-TiO<sub>2</sub>

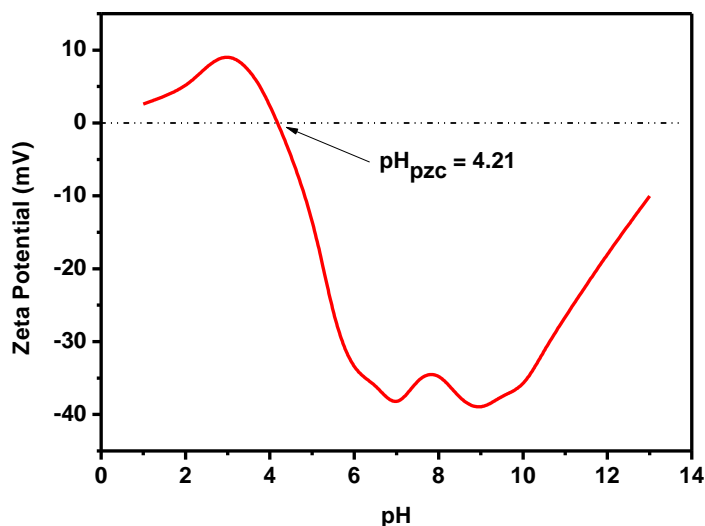

67

68

FIGURE S6: The isoelectric point of n-TiO<sub>2</sub>.

69

70 The detail results of the orthogonal experiment

71

TABLE S7: The detail results of the range analysis.

| Factor   | $K_1$  | $K_2$  | $K_3$  | $\bar{K}_1$ | $\bar{K}_2$ | $\bar{K}_3$ | $R$   |
|----------|--------|--------|--------|-------------|-------------|-------------|-------|
| pH       | 274.44 | 218.89 | 346.67 | 30.49       | 24.32       | 38.52       | 14.2  |
| IS       | 140.00 | 218.89 | 481.11 | 15.56       | 24.32       | 53.46       | 37.9  |
| pH × IS  | 272.22 | 285.56 | 282.22 | 30.25       | 31.73       | 31.36       | 1.48  |
| pH × IS  | 283.33 | 261.11 | 295.56 | 31.48       | 29.01       | 32.84       | 3.83  |
| NOM      | 351.11 | 268.89 | 220.00 | 39.01       | 29.88       | 24.44       | 14.57 |
| pH × NOM | 287.78 | 268.89 | 283.33 | 31.98       | 29.88       | 31.48       | 2.10  |
| pH × NOM | 273.33 | 278.78 | 278.89 | 30.37       | 31.98       | 30.99       | 1.61  |

|                 |        |        |        |       |       |       |      |
|-----------------|--------|--------|--------|-------|-------|-------|------|
| <b>IS × NOM</b> | 290.00 | 290.00 | 260.00 | 32.22 | 32.22 | 28.89 | 3.33 |
| <b>BLANK</b>    | 287.78 | 282.22 | 270.00 | 31.98 | 31.36 | 30.00 | 1.98 |
| <b>BLANK</b>    | 277.78 | 280.00 | 280.00 | 30.86 | 31.11 | 31.11 | 0.25 |
| <b>IS × NOM</b> | 292.22 | 264.44 | 283.33 | 32.47 | 29.38 | 31.48 | 3.09 |
| <b>BLANK</b>    | 281.11 | 277.78 | 281.11 | 31.23 | 30.86 | 31.23 | 0.37 |
| <b>BLANK</b>    | 278.89 | 280.00 | 281.11 | 30.99 | 31.11 | 31.23 | 0.24 |

72 \*R is range difference,  $K_1$ ,  $K_2$ , and  $K_3$  represent the sum of SE with each factor in level 1, level 2,  
73 level 3,  $\bar{K}_1$ ,  $\bar{K}_2$ , and  $\bar{K}_3$  represent the average number of SE with each factor in level 1, level 2,  
74 level 3 and “×” represents the interaction between two factors.

75

76

TABLE S8: The detail results of the variance analysis.

| <b>Factor</b>   | $\bar{K}_1$ | $\bar{K}_2$ | $\bar{K}_3$ | $\bar{K}$ | <b>S</b> |
|-----------------|-------------|-------------|-------------|-----------|----------|
| <b>pH</b>       | 30.49       | 24.32       | 38.52       | 31.11     | 101.40   |
| <b>IS</b>       | 15.56       | 24.32       | 53.46       | 31.11     | 787.43   |
| <b>pH × IS</b>  | 30.25       | 31.73       | 31.36       | 31.11     | 1.19     |
| <b>pH × IS</b>  | 31.48       | 29.01       | 32.84       | 31.11     | 7.54     |
| <b>NOM</b>      | 39.01       | 29.88       | 24.44       | 31.11     | 108.41   |
| <b>pH × NOM</b> | 31.98       | 29.88       | 31.48       | 31.11     | 2.41     |
| <b>pH × NOM</b> | 30.37       | 31.98       | 30.99       | 31.11     | 1.32     |
| <b>IS × NOM</b> | 32.22       | 32.22       | 28.89       | 31.11     | 7.39     |
| <b>BLANK</b>    | 31.98       | 31.36       | 30.00       | 31.11     | 2.05     |
| <b>BLANK</b>    | 30.86       | 31.11       | 31.11       | 31.03     | 0.04     |



|                 |       |       |       |       |      |
|-----------------|-------|-------|-------|-------|------|
| <b>IS × NOM</b> | 32.47 | 29.38 | 31.48 | 31.11 | 4.98 |
| <b>BLANK</b>    | 31.23 | 30.86 | 31.23 | 31.11 | 0.09 |
| <b>BLANK</b>    | 30.99 | 31.11 | 31.23 | 31.11 | 0.03 |

77 \*S is sum of square of deviations,  $\bar{K}_1$ ,  $\bar{K}_2$ , and  $\bar{K}_3$  represent the average number of SE with  
78 each factor in level 1, level 2, and level 3,  $\bar{K}$  represents the average number of  $\bar{K}_1$ ,  $\bar{K}_2$ , and  
79  $\bar{K}_3$  while “×” represents the interaction between two factors.

80

81 **The estimate ionic strength of the environmental water samples**

82 TABLE S9: The estimate ionic strength of the environmental water samples.

| <b>NO.</b>               | <b>IS (Na<sup>+</sup> and K<sup>+</sup>) (mM)</b> | <b>IS (Mg<sup>2+</sup> and Ca<sup>2+</sup>) (mM)</b> | <b>IS<sub>Total</sub> (mM)</b> |
|--------------------------|---------------------------------------------------|------------------------------------------------------|--------------------------------|
| <b>1<sup>#</sup></b>     | 0.185                                             | 1.90                                                 | 2.735                          |
| <b>2<sup>#</sup></b>     | 0.825                                             | 2.60                                                 | 5.770                          |
| <b>3<sup>#</sup></b>     | 0.490                                             | 1.88                                                 | 3.605                          |
| <b>10%-4<sup>#</sup></b> | 20.8                                              | 10.94                                                | 59.29                          |
| <b>5<sup>#</sup></b>     | 8.56                                              | 5.68                                                 | 26.56                          |
| <b>6<sup>#</sup></b>     | 0.145                                             | 0.120                                                | 0.3740                         |
| <b>7<sup>#</sup></b>     | 4.05                                              | 2.62                                                 | 15.64                          |

83 \*The estimate total ionic strength only includes the ionic strength brought by Na<sup>+</sup>, K<sup>+</sup>, Mg<sup>2+</sup>, Ca<sup>2+</sup>,  
84 Cl<sup>-</sup>, NO<sub>3</sub><sup>-</sup> and SO<sub>4</sub><sup>2-</sup>.
